# Supplementary material for: HbA1c, diabetes and cognitive decline: the English Longitudinal Study of Ageing
Source: PubMed Central journal article supplement (PMC6448974; doi:10.1007/s00125-017-4541-7), 2018-01-25
Supplement: 125_2017_4541_MOESM1_ESM.pdf [file 125_2017_4541_MOESM1_ESM.pdf]

## Electronic supplementary material

Fanfan Zheng, Li Yan, Zhenchun Yang, Baoliang Zhong, Wuxiang Xie. Glycated haemoglobin, diabetes and cognitive decline: the English Longitudinal Study of Ageing. *Diabetologia*.

### Methods

**Table 1** Linear associations between baseline glycated haemoglobin levels (per one unit increment, %) and cognitive Z scores: cross-sectional analyses using multiple linear regressions

**Table 2** Mean difference in rate of change in cognitive Z scores (SD/year) between diabetes participants with and without anti-diabetic therapies at baseline: longitudinal analyses using linear mixed models

**Table 3** Comparison of baseline characteristics between participants included (n=5189), and excluded due to incomplete baseline data or confirmed diagnosis of dementia and/or Alzheimer's disease (n=3649)

**Table 4** Comparison of baseline characteristics between participants included (n=5189) and excluded due to loss to follow-up (n=594)

**Table 5** Association between baseline glycated haemoglobin levels (per one unit increment, %) and rate of change in cognitive Z scores (SD/year): longitudinal analyses using linear mixed models, with multiple imputation for missing data for cognitive tests at wave 3 to wave 7, n=5783

**Table 6** Mean difference in rate of change in cognitive Z scores (SD/year) comparing categories of baseline diabetes status: longitudinal analyses using linear mixed models, with multiple imputation for missing data for cognitive tests at wave 3 to wave 7, n=5783

**Table 7** Association between baseline glycated haemoglobin levels (per one unit increment, %) and rate of change in cognitive Z scores (SD/year): longitudinal analyses using linear mixed models, a sensitivity analysis excluding 261 participants with incident diabetes during follow-up, n=4928

**Table 8** Mean difference in rate of change in cognitive Z scores (SD/year) comparing categories of baseline diabetes status: longitudinal analyses using linear mixed models, a sensitivity analysis excluding 261 participants with incident diabetes during follow-up, n=4928

**Table 9** Categories of diabetes based on different diagnosis standards

**Fig. 1** Baseline cognitive Z scores and 95% confidence intervals by diabetes status

**Fig. 2** (A) The trajectories of global cognitive Z scores by baseline diabetes status and HbA<sub>1c</sub> levels; (B) difference in global cognitive Z scores decline by baseline diabetes status and HbA<sub>1c</sub> levels compared with decline in participants with normoglycaemia

## Methods

### Covariates

Total cholesterol (Cholesterol Oxidase assay method), high-density lipoprotein cholesterol (direct method), and triacylglycerol (enzymatic method) levels were measured using the Olympus 640 analyser calibrated to the center for disease control guidelines. Circulating high-sensitivity C-reactive protein (CRP) was assessed using the N latex CRP mono immunoassay on the Dade Behring Nephelometer II Analyser and conducted in line with the quality control guidelines specified in the Health Survey of England technical report [1]. Blood pressure was measured by the nurse on the right arm of each participant while they were in a sitting position, using the Omron HEM-907 [1]. Five minutes elapsed before the first reading was taken. The mean value of three consecutive blood pressure readings was used in our analyses. Hypertension was considered as a systolic blood pressure of  $\geq 140$  mm Hg and/or a diastolic blood pressure of  $\geq 90$  mm Hg, or if the participant was currently using anti-hypertensive drugs. Education level was classified as no qualification, level 1 national vocational qualification (NVQ) or certificate of secondary education, NVQ2 or O-level, NVQ3 or A-level, higher qualification but below degree, and degree level or higher or NVQ4/5. Marital status was classified as single (never married), married, remarried, legally separated, divorced, and widowed. We defined cohabitation status as currently living alone or not. Participants were split into two groups: non-smokers (never smoked or ex-smokers) and smokers (current smokers). Alcohol intake was calculated from participant-reported drinking frequency over the previous year (weekly drinking versus occasional or never). Standing height was measured with a portable stadiometer, with participants standing in the center of the base plate looking straight ahead, and weight was measured using a portable electronic scales [1]. Body mass index was

calculated with the following formula: weight (kg) / height<sup>2</sup> (m<sup>2</sup>). Depressive symptoms were measured with the eight-item version of the Center for Epidemiologic Studies Depression Scale, a widely used self-report measure of depressive symptoms, used to identify people at risk of depression in population-based studies. As in previous studies, we used a score of  $\geq 4$  to define cases of elevated depressive symptoms [2]. Measures of chronic disease included lifetime self-reported physician diagnoses of coronary heart disease (angina and heart attack), stroke, chronic lung disease, and cancer.

## References

1. Graig R, Deverill C, Pickering K (2006) Quality control of blood saliva and urine analytes. In: Spronston k, mindell j, editors. Health survey for england 2004, methodology and documentation, vol. 2. London: The information centre
2. Hamer M, Batty GD, Kivimaki M (2012) Risk of future depression in people who are obese but metabolically healthy: The English Longitudinal Study of Ageing. *Mol Psychiatry* 17:940-945

**Table 1** Linear associations between baseline glycated haemoglobin levels (per one unit increment, %) and cognitive Z scores: cross-sectional analyses using multiple linear regressions

| Baseline cognitive Z scores | Model 1 <sup>a</sup>    |                | Model 2 <sup>b</sup>   |                |
|-----------------------------|-------------------------|----------------|------------------------|----------------|
|                             | $\beta$ (95% CI)        | <i>P</i> value | $\beta$ (95% CI)       | <i>P</i> value |
| Global cognitive Z scores   | -0.054 (-0.089, -0.020) | 0.002          | -0.015 (-0.050, 0.020) | 0.396          |
| Memory Z scores             | -0.071 (-0.105, -0.036) | <0.001         | -0.032 (-0.067, 0.004) | 0.080          |
| Executive function Z scores | -0.052 (-0.089, -0.016) | 0.005          | -0.015 (-0.052, 0.022) | 0.423          |
| Orientation Z scores        | 0.007 (-0.030, 0.045)   | 0.702          | 0.014 (-0.025, 0.054)  | 0.478          |

<sup>a</sup>Model 1: adjusted for baseline age and sex.

<sup>b</sup>Model 2: further adjusted for baseline total cholesterol, high-density lipoprotein cholesterol, triacylglycerol, high-sensitivity C-reactive protein, body mass index, education, marital status, depression symptoms, current smoking, alcohol consumption, hypertension, coronary heart disease, stroke, chronic lung disease, and cancer.

**Table 2** Mean difference in rate of change in cognitive Z scores (SD/year) between diabetes participants with and without anti-diabetic therapies at baseline: longitudinal analyses using linear mixed models

|                             | Mean difference (95% CI) in rate of change in cognitive Z scores (SD/year) |                                  |                         |
|-----------------------------|----------------------------------------------------------------------------|----------------------------------|-------------------------|
|                             | Diabetes without treatments (n=189)                                        | Diabetes with treatments (n=257) | <i>P</i> for difference |
| Global cognitive Z scores   |                                                                            |                                  |                         |
| Model 1 <sup>a</sup>        | 0.000 (ref)                                                                | 0.017 (-0.012, 0.046)            | 0.250                   |
| Model 2 <sup>b</sup>        | 0.000 (ref)                                                                | 0.018 (-0.011, 0.047)            | 0.230                   |
| Memory Z scores             |                                                                            |                                  |                         |
| Model 1 <sup>a</sup>        | 0.000 (ref)                                                                | 0.003 (-0.020, 0.026)            | 0.786                   |
| Model 2 <sup>b</sup>        | 0.000 (ref)                                                                | 0.003 (-0.020, 0.026)            | 0.798                   |
| Executive function Z scores |                                                                            |                                  |                         |
| Model 1 <sup>a</sup>        | 0.000 (ref)                                                                | -0.006 (-0.029, 0.018)           | 0.632                   |
| Model 2 <sup>b</sup>        | 0.000 (ref)                                                                | -0.005 (-0.029, 0.018)           | 0.667                   |
| Orientation Z scores        |                                                                            |                                  |                         |
| Model 1 <sup>a</sup>        | 0.000 (ref)                                                                | 0.028 (-0.005, 0.061)            | 0.096                   |
| Model 2 <sup>b</sup>        | 0.000 (ref)                                                                | 0.028 (-0.005, 0.060)            | 0.101                   |

<sup>a</sup>Model 1: adjusted for baseline age and sex.

<sup>b</sup>Model 2: further adjusted for baseline total cholesterol, high-density lipoprotein cholesterol, triacylglycerol, high-sensitivity C-reactive protein, body mass index, education, marital status, depression symptoms, current smoking, alcohol consumption, hypertension, coronary heart disease, stroke, chronic lung disease, and cancer.

**Table 3** Comparison of baseline characteristics between participants included (n=5189), and excluded due to incomplete baseline data or confirmed diagnosis of dementia and/or Alzheimer's disease (n=3649)

| Characteristic                      | Included<br>(n=5189) | Excluded<br>(n=3649) | <i>P</i> for<br>difference* |
|-------------------------------------|----------------------|----------------------|-----------------------------|
| Age (years)                         | 65.6±9.4             | 65.4±12.3            | 0.354                       |
| Women (%)                           | 2860 (55.1)          | 2148 (58.9)          | <0.001                      |
| Education ≥ NVQ3/GCE A level (%)    | 1754 (33.8)          | 1034 (28.3)          | <0.001                      |
| Living alone (%)                    | 1668 (32.1)          | 1294 (35.5)          | 0.001                       |
| Depressive symptoms (%)             | 696 (13.4)           | 633 (17.4)           | <0.001                      |
| Current smoking (%)                 | 720 (13.9)           | 659 (18.1)           | <0.001                      |
| Alcoholic drink ≥ once per week (%) | 3027 (58.3)          | 1667 (45.7)          | <0.001                      |
| Self-reported diagnosis of diabetes | 358 (6.9)            | 346 (9.5)            | <0.001                      |
| Coronary heart disease (%)          | 327 (6.3)            | 304 (8.3)            | <0.001                      |
| Stroke (%)                          | 100 (1.9)            | 170 (4.7)            | <0.001                      |
| Chronic lung disease (%)            | 251 (4.8)            | 200 (5.5)            | 0.176                       |
| Cancer (%)                          | 268 (5.2)            | 200 (5.5)            | 0.513                       |
| Memory scores                       | 10.3±3.4             | 9.6±3.8              | <0.001                      |
| Executive function scores           | 20.5±6.3             | 19.1±7.1             | <0.001                      |
| Orientation scores                  | 3.78±0.49            | 3.67±0.76            | <0.001                      |

The results are presented as mean ± SD or n (%).

\*The differences between participants included and excluded were tested using the *t*-test or chi-square test.

**Table 4** Comparison of baseline characteristics between participants included (n=5189) and excluded due to loss to follow-up (n=594)

| Characteristic                       | Included<br>(n=5189) | Loss to follow-up<br>(n=594) | <i>P</i> for<br>difference* |
|--------------------------------------|----------------------|------------------------------|-----------------------------|
| Age (years)                          | 65.6±9.4             | 69.5±11.3                    | <0.001                      |
| Women (%)                            | 2860 (55.1)          | 298 (50.2)                   | 0.022                       |
| Glycated haemoglobin (mmol/mol)      | 37.4±8.6             | 37.8±9.1                     | 0.335                       |
| Glycated haemoglobin (%)             | 5.57±0.79            | 5.60±0.83                    | 0.335                       |
| Total cholesterol (mmol/l)           | 5.93±1.20            | 5.77±1.23                    | 0.001                       |
| HDL cholesterol (mmol/l)             | 1.53±0.39            | 1.48±0.37                    | 0.001                       |
| Triacylglycerol (mmol/l)             | 1.5 (1.1–2.2)        | 1.5 (1.1–2.2)                | 0.839                       |
| High-sensitivity CRP (nmol/l)        | 18.1 (8.6–39.0)      | 22.9 (10.5–54.3)             | <0.001                      |
| Body mass index (kg/m <sup>2</sup> ) | 27.8±4.6             | 27.6±4.7                     | 0.478                       |
| Systolic blood pressure (mm Hg)      | 135.9±18.5           | 138.5±20.6                   | 0.003                       |
| Diastolic blood pressure (mm Hg)     | 75.8±10.8            | 75.1±12.2                    | 0.159                       |
| Education ≥ NVQ3/GCE A level (%)     | 1754 (33.8)          | 119 (20.0)                   | <0.001                      |
| Living alone (%)                     | 1668 (32.1)          | 200 (33.7)                   | 0.450                       |
| Depressive symptoms (%)              | 696 (13.4)           | 96 (16.2)                    | 0.065                       |
| Current smoking (%)                  | 720 (13.9)           | 96 (16.2)                    | 0.129                       |
| Alcoholic drink ≥ once per week (%)  | 3027 (58.3)          | 288 (48.5)                   | <0.001                      |
| Hypertension (%)                     | 2393 (46.1)          | 305 (51.4)                   | 0.015                       |
| Diabetes (%)                         | 446 (8.6)            | 64 (10.8)                    | 0.076                       |
| Coronary heart disease (%)           | 327 (6.3)            | 49 (8.3)                     | 0.068                       |
| Stroke (%)                           | 100 (1.9)            | 24 (4.0)                     | <0.001                      |
| Chronic lung disease (%)             | 251 (4.8)            | 38 (6.4)                     | 0.098                       |
| Cancer (%)                           | 268 (5.2)            | 40 (6.7)                     | 0.106                       |
| Memory scores                        | 10.3±3.4             | 8.8±3.7                      | <0.001                      |
| Executive function scores            | 20.5±6.3             | 18.0±6.5                     | <0.001                      |
| Orientation scores                   | 3.78±0.49            | 3.66±0.70                    | <0.001                      |

The results are presented as mean ± SD, median (quartile 1–quartile 3), or n (%).

\*The differences between participants included and excluded were tested using the *t*-test, Wilcoxon rank test or chi-square test.

**Table 5** Association between baseline glycated haemoglobin levels (per one unit increment, %) and rate of change in cognitive Z scores (SD/year): longitudinal analyses using linear mixed models, with multiple imputation for missing data for cognitive tests at wave 3 to wave 7, n=5783

|                             | Model 1 <sup>a</sup>    |                | Model 2 <sup>b</sup>    |                |
|-----------------------------|-------------------------|----------------|-------------------------|----------------|
|                             | $\beta$ (95% CI)        | <i>P</i> value | $\beta$ (95% CI)        | <i>P</i> value |
| Global cognitive Z scores   | -0.009 (-0.015, -0.003) | 0.002          | -0.009 (-0.015, -0.003) | 0.003          |
| Memory Z scores             | -0.005 (-0.009, -0.001) | 0.024          | -0.005 (-0.009, -0.001) | 0.036          |
| Executive function Z scores | -0.008 (-0.013, -0.004) | <0.001         | -0.008 (-0.013, -0.003) | 0.001          |
| Orientation Z scores        | -0.004 (-0.011, 0.002)  | 0.209          | -0.004 (-0.011, 0.003)  | 0.241          |

<sup>a</sup>Model 1: adjusted for baseline age and sex.

<sup>b</sup>Model 2: further adjusted for total cholesterol, high-density lipoprotein cholesterol, triacylglycerol, high-sensitivity C-reactive protein, body mass index, education, marital status, depression symptoms, current smoking, alcohol consumption, hypertension, coronary heart disease, stroke, chronic lung disease, and cancer.



**Table 6** Mean difference in rate of change in cognitive Z scores (SD/year) comparing categories of baseline diabetes status: longitudinal analyses using linear mixed models, with multiple imputation for missing data for cognitive tests at wave 3 to wave 7, n=5783

|                             | Mean difference (95% CI) in rate of change by baseline diabetes status |                         |                         | <i>P</i> for trend |
|-----------------------------|------------------------------------------------------------------------|-------------------------|-------------------------|--------------------|
|                             | Normal (n=3553)                                                        | Prediabetes (n=1190)    | Diabetes (n=446)        |                    |
| Global cognitive Z scores   |                                                                        |                         |                         |                    |
| Model 1 <sup>a</sup>        | 0.000 (ref)                                                            | -0.011 (-0.021, -0.002) | -0.031 (-0.046, -0.016) | <0.001             |
| Model 2 <sup>b</sup>        | 0.000 (ref)                                                            | -0.011 (-0.021, -0.001) | -0.031 (-0.046, -0.016) | <0.001             |
| Memory Z scores             |                                                                        |                         |                         |                    |
| Model 1 <sup>a</sup>        | 0.000 (ref)                                                            | -0.003 (-0.010, 0.004)  | -0.016 (-0.027, -0.005) | 0.012              |
| Model 2 <sup>b</sup>        | 0.000 (ref)                                                            | -0.003 (-0.010, 0.005)  | -0.015 (-0.027, -0.004) | 0.016              |
| Executive function Z scores |                                                                        |                         |                         |                    |
| Model 1 <sup>a</sup>        | 0.000 (ref)                                                            | -0.009 (-0.017, -0.002) | -0.024 (-0.036, -0.011) | <0.001             |
| Model 2 <sup>b</sup>        | 0.000 (ref)                                                            | -0.009 (-0.017, -0.001) | -0.023 (-0.035, -0.011) | <0.001             |
| Orientation Z scores        |                                                                        |                         |                         |                    |
| Model 1 <sup>a</sup>        | 0.000 (ref)                                                            | -0.009 (-0.020, 0.002)  | -0.022 (-0.040, -0.005) | 0.004              |
| Model 2 <sup>b</sup>        | 0.000 (ref)                                                            | -0.009 (-0.020, 0.003)  | -0.024 (-0.041, -0.006) | 0.005              |

<sup>a</sup>Model 1: adjusted for baseline age and sex.

<sup>b</sup>Model 2: further adjusted for baseline total cholesterol, high-density lipoprotein cholesterol, triacylglycerol, high-sensitivity C-reactive protein, body mass index, education, marital status, depression symptoms, current smoking, alcohol consumption, hypertension, coronary heart disease, stroke, chronic lung disease, and cancer.

**Table 7** Association between baseline glycated haemoglobin levels (per one unit increment, %) and rate of change in cognitive Z scores (SD/year): longitudinal analyses using linear mixed models, a sensitivity analysis excluding 261 participants with incident diabetes during follow-up, n=4928

|                             | Model 1 <sup>a</sup>    |                | Model 2 <sup>b</sup>    |                |
|-----------------------------|-------------------------|----------------|-------------------------|----------------|
|                             | $\beta$ (95% CI)        | <i>P</i> value | $\beta$ (95% CI)        | <i>P</i> value |
| Global cognitive Z scores   | -0.010 (-0.016, -0.004) | 0.002          | -0.010 (-0.016, -0.004) | 0.002          |
| Memory Z scores             | -0.005 (-0.010, -0.001) | 0.021          | -0.005 (-0.009, -0.001) | 0.026          |
| Executive function Z scores | -0.009 (-0.014, -0.005) | <0.001         | -0.009 (-0.014, -0.004) | <0.001         |
| Orientation Z scores        | -0.004 (-0.011, 0.003)  | 0.234          | -0.004 (-0.011, 0.003)  | 0.256          |

<sup>a</sup>Model 1: adjusted for baseline age and sex.

<sup>b</sup>Model 2: further adjusted for baseline total cholesterol, high-density lipoprotein cholesterol, triacylglycerol, high-sensitivity C-reactive protein, body mass index, education, marital status, depression symptoms, current smoking, alcohol consumption, hypertension, coronary heart disease, stroke, chronic lung disease, and cancer.

**Table 8** Mean difference in rate of change in cognitive Z scores (SD/year) comparing categories of baseline diabetes status: longitudinal analyses using linear mixed models, a sensitivity analysis excluding 261 participants with incident diabetes during follow-up, n=4928

|                             | Mean difference (95% CI) in rate of change by baseline diabetes status |                         |                         | <i>P</i> for trend |
|-----------------------------|------------------------------------------------------------------------|-------------------------|-------------------------|--------------------|
|                             | Normal (n=3553)                                                        | Prediabetes (n=1190)    | Diabetes (n=446)        |                    |
| Global cognitive Z scores   |                                                                        |                         |                         |                    |
| Model 1 <sup>a</sup>        | 0.000 (ref)                                                            | -0.014 (-0.025, -0.004) | -0.031 (-0.046, -0.015) | <0.001             |
| Model 2 <sup>b</sup>        | 0.000 (ref)                                                            | -0.014 (-0.024, -0.003) | -0.031 (-0.046, -0.015) | <0.001             |
| Memory Z scores             |                                                                        |                         |                         |                    |
| Model 1 <sup>a</sup>        | 0.000 (ref)                                                            | -0.001 (-0.009, 0.006)  | -0.015 (-0.027, -0.004) | 0.027              |
| Model 2 <sup>b</sup>        | 0.000 (ref)                                                            | -0.001 (-0.009, 0.006)  | -0.015 (-0.026, -0.004) | 0.030              |
| Executive function Z scores |                                                                        |                         |                         |                    |
| Model 1 <sup>a</sup>        | 0.000 (ref)                                                            | -0.009 (-0.017, -0.000) | -0.022 (-0.034, -0.009) | <0.001             |
| Model 2 <sup>b</sup>        | 0.000 (ref)                                                            | -0.009 (-0.017, -0.000) | -0.021 (-0.034, -0.009) | <0.001             |
| Orientation Z scores        |                                                                        |                         |                         |                    |
| Model 1 <sup>a</sup>        | 0.000 (ref)                                                            | -0.011 (-0.023, 0.002)  | -0.022 (-0.040, -0.004) | 0.004              |
| Model 2 <sup>b</sup>        | 0.000 (ref)                                                            | -0.010 (-0.022, 0.002)  | -0.023 (-0.041, -0.005) | 0.005              |

<sup>a</sup>Model 1: adjusted for baseline age and sex.

<sup>b</sup>Model 2: further adjusted for baseline total cholesterol, high-density lipoprotein cholesterol, triacylglycerol, high-sensitivity C-reactive protein, body mass index, education, marital status, depression symptoms, current smoking, alcohol consumption, hypertension, coronary heart disease, stroke, chronic lung disease, and cancer.

**Table 9** Categories of diabetes based on different diagnosis standards.

| Diabetes_2 <sup>b</sup> | Diabetes <sup>a</sup> |     |                   |
|-------------------------|-----------------------|-----|-------------------|
|                         | No                    | Yes | Total             |
| No                      | 2965                  | 28  | 2993              |
| Yes                     | 18                    | 375 | 393               |
| Total                   | 2983                  | 403 | 3386 <sup>c</sup> |

<sup>a</sup>Diabetes was defined as an HbA1c level  $\geq 7.5$  mmol/mol (6.5%), a self-reported physician diagnosis of diabetes, or current use of anti-diabetic therapy.

<sup>b</sup>Diabetes\_2 was defined as a fasting blood glucose level  $\geq 7.0$  mmol/l, a self-reported physician diagnosis of diabetes, or current use of anti-diabetic therapy.

<sup>c</sup>Only 3386 participants have provided data of fasting glucose levels.

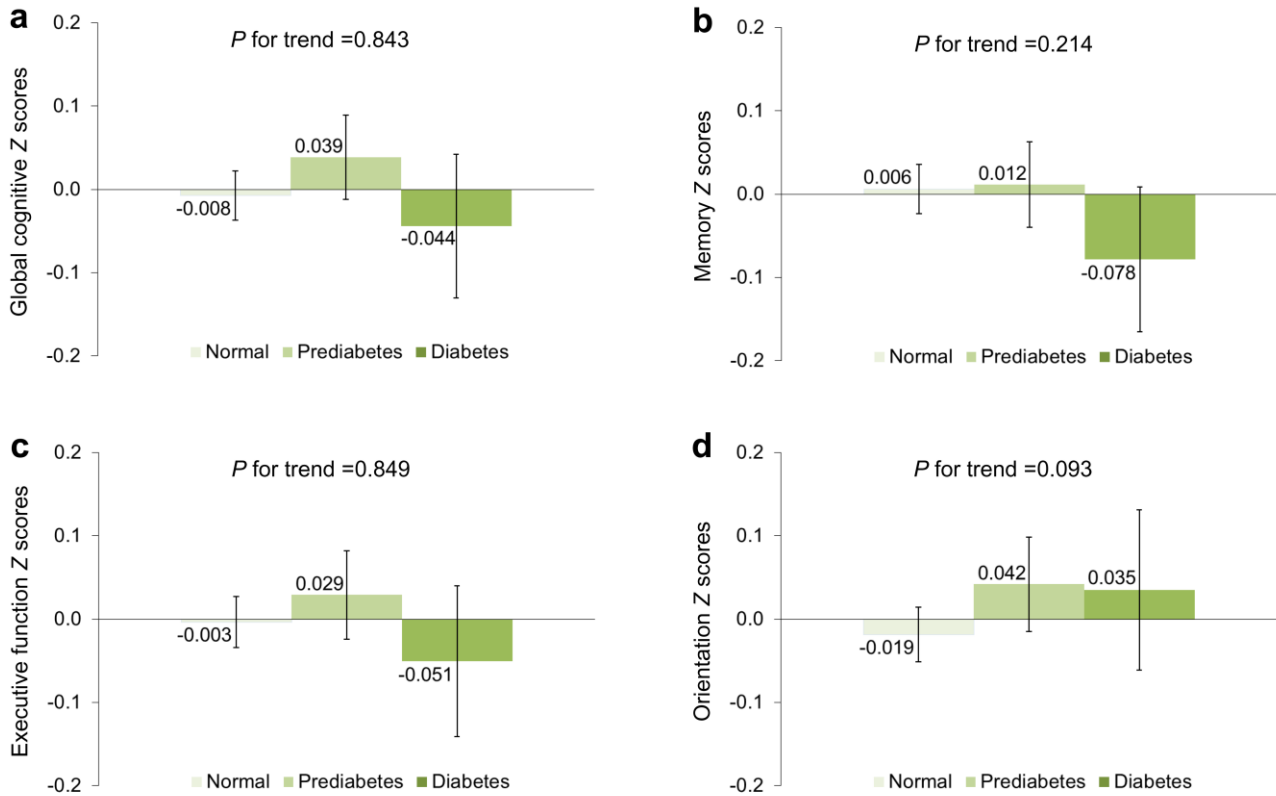

**Fig. 1** Baseline cognitive Z scores and 95% confidence intervals by diabetes status.

Cross-sectional analyses using analyses of covariance, adjusted for baseline age, sex, total cholesterol, high-density lipoprotein cholesterol, triacylglycerol, high-sensitivity CRP, body mass index, education, marital status, depression symptoms, current smoking, alcohol consumption, hypertension, coronary heart disease, stroke, chronic lung disease, and cancer.

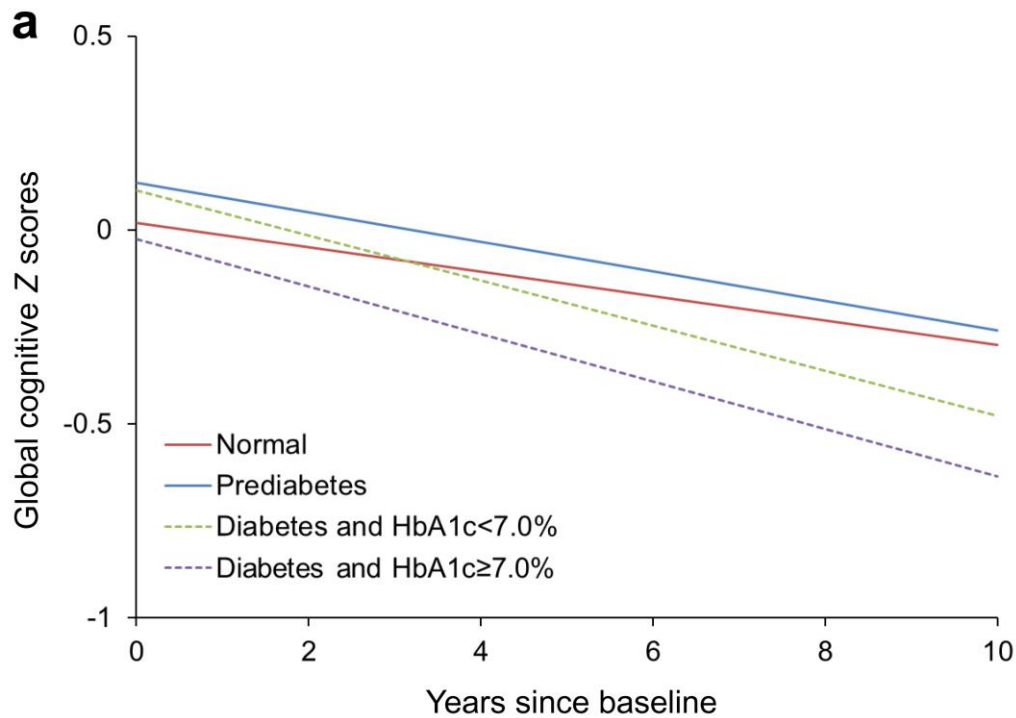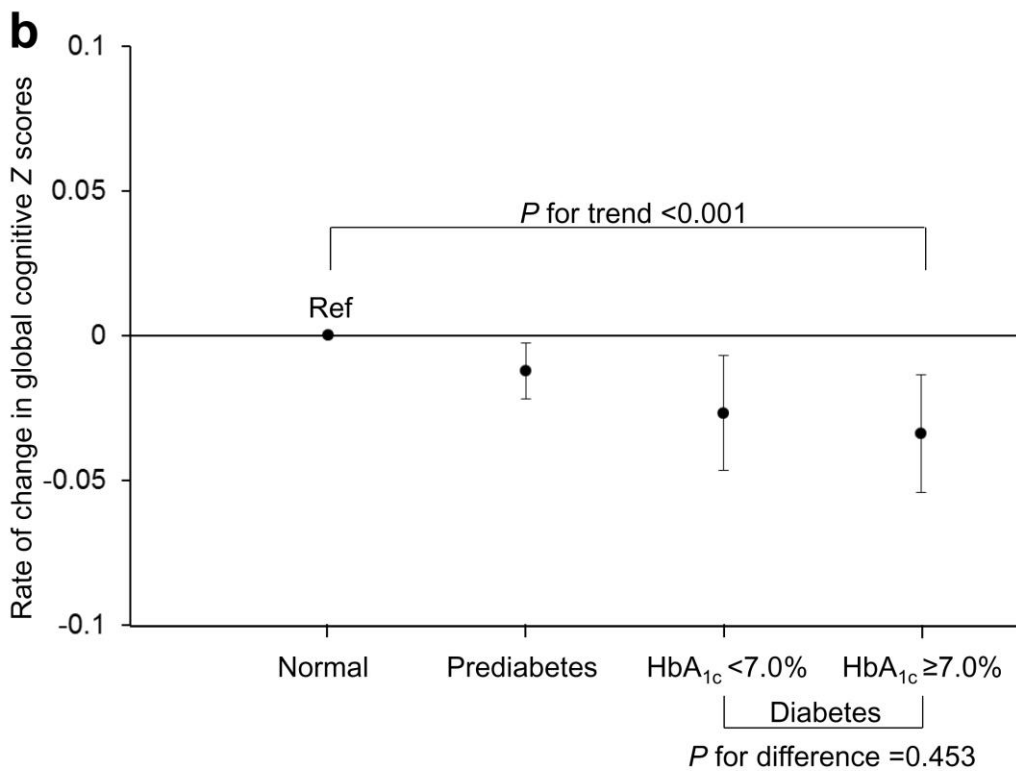

**Fig. 2** (A) The trajectories of global cognitive Z scores by baseline diabetes status and HbA<sub>1c</sub> levels; (B) difference in global cognitive Z scores decline (SD/year) by baseline diabetes status and HbA<sub>1c</sub> levels compared with decline in participants with normoglycemia, adjusting for baseline age, sex, total cholesterol, high-density lipoprotein cholesterol, triacylglycerol, high-sensitivity CRP, body mass index, education, marital status, depression symptoms, current smoking, alcohol consumption, hypertension, coronary heart disease, stroke, chronic lung disease, and cancer.
